# Supplementary material
Source: Springer Nature journal article supplement (https://www.springermedizin.de/resource/supplementary/13063_2011_762_MOESM3_ESM.pdf/9618672)
Supplement: MOESM3 [file 9618672]

# How to operate gateway?



**GW9014A**  
TeleHealth Gateway



**Quick Installation Steps**  
Distributed by  
Fora Care Inc.  
810 Lawrence Drive, Suite 104,  
Newberry Park, CA 91320 USA  
[www.foracare.com/usa](http://www.foracare.com/usa)

**Your Package Contains**

- Data Cable **A**
- AC Power Adapter **B**
- (Optional) Telephone Line **C**
- (Optional) Network Cable **D**

**STEP 1** • Rear View of Meter •

Insert A into port 1



**STEP 2**

If you are using Ethernet, connect B to Port 2. Then connect it into your Internet router.



**STEP 3**

If you are using a Phone, connect C into Port 3. Then connect C into the phone wall jack.

To use your phone, plug your phone's line into Port 4.



**STEP 4**

Insert D into Port 5. Plug D into an outlet.

Switch on the Power Button



**Connecting your monitor to your Gateway**

Connect A into your monitor.



Your monitor will read "MC" once it is connected.

Available in English  
and Spanish.
